# Supplementary material
Source: publisher figshare collection journal article supplement (https://geolsoc.figshare.com/ndownloader/files/5424650)
Supplement: Supplementary file 1 [file 5424650]

Stage	n°	Species	Formation	Locality	NP	Age	?18O	Salinity	global ?18Ow	?18Ow BP	Temperature
						(Ma)	(‰)	(‰)	(‰)	(‰)	(°C)
Stampian	C9	Cerithium intradentatum	Falun de Jeurre	Etampes (91)	NP23	31.8	-1.0	30	-0.2	-0.7	21
	C8	Cerithium sp.	Argiles à Corbules	Rauville-la-Place (50)	NP21	33.6	2.0	33	0	0.05	12
Bartonian	C7	Serratocerithium maryense	Sables de Beauchamp	Ver-sur-Launette (60)	NP16	39.7	-3.1	30	-0.6	-0.7	29
Lutetian	C6	Serratocerithium serratum	Calcaire grossier moyen	Chaignes-Douains (27)	NP15	42.4	-0.3	35	-0.75	0.55	21
	C5	Serratocerithium denticulatum	Calcaire grossier moyen	Beynes (78)	NP15	43.7	-0.8	35	-0.75	0.55	23
	C4	Serratocerithium denticulatum	Calcaire grossier moyen	Gargenville (78)	NP15	44	-0.6	35	-0.75	0.55	23
	C3	Serratocerithium serratum	Calcaire grossier moyen	Damery (51)	NP15	44	-1.3	35	-0.75	0.55	26
	C2	Cerithium sp,	Calcaire grossier moyen	Grignon (78)	NP15	44	-0.5	35	-0.75	0.55	22
	C1	Rhinoclavis (Semivertagus) sp.	Calcaire à N laevigatus	Chaumont-en-Vexin (60)	NP15	45.2	-1.3	35	-0.75	0.55	26
